# Supplementary material
Source: bioRxiv or medRxiv preprint supplement (https://www.medrxiv.org/highwire/filestream/91695/field_highwire_adjunct_files/0/2020.07.22.20160168-1.pdf)
Supplement: Supplementary file [file 2020.07.22.20160168-1.pdf]

## S1. Sources of epidemiological data

| Country            | Source                                                    | URL                                                                                                                                                                                                                                                                                             |
|--------------------|-----------------------------------------------------------|-------------------------------------------------------------------------------------------------------------------------------------------------------------------------------------------------------------------------------------------------------------------------------------------------|
| Argentina          | Ministry of Health                                        | <a href="https://www.argentina.gob.ar/coronavirus/informe-diario">https://www.argentina.gob.ar/coronavirus/informe-diario</a>                                                                                                                                                                   |
| Belize             | World Health Organization                                 | <a href="https://who.maps.arcgis.com/apps/webappviewer/index.html">https://who.maps.arcgis.com/apps/webappviewer/index.html</a>                                                                                                                                                                 |
| Bolivia            | National Health Information System                        | <a href="https://snis.minsalud.gob.bo/">https://snis.minsalud.gob.bo/</a>                                                                                                                                                                                                                       |
| Brazil             | Ministry of Health                                        | <a href="https://especiais.g1.globo.com/bemestar/coronavirus/mapa-coronavirus/#/">https://especiais.g1.globo.com/bemestar/coronavirus/mapa-coronavirus/#/</a>                                                                                                                                   |
| Canada             | University of Toronto                                     | <a href="https://github.com/ishaberry/Covid19Canada/blob/master/cases.csv">https://github.com/ishaberry/Covid19Canada/blob/master/cases.csv</a>                                                                                                                                                 |
| Chile              | Ministry of Health                                        | <a href="https://www.minsal.cl/nuevo-coronavirus-2019-ncov/informe-epidemiologico-covid-19/">https://www.minsal.cl/nuevo-coronavirus-2019-ncov/informe-epidemiologico-covid-19/</a>                                                                                                             |
| Colombia           | Ministry of Technologies of information and Communication | <a href="https://www.datos.gov.co/en/d/gt2j-8ykr/visualization#">https://www.datos.gov.co/en/d/gt2j-8ykr/visualization#</a>                                                                                                                                                                     |
| Cuba               | Pan-American Health Organization                          | <a href="https://who.maps.arcgis.com/apps/webappviewer/index.html?id=2203b04c3a5f486685a15482a0d97a87">https://who.maps.arcgis.com/apps/webappviewer/index.html?id=2203b04c3a5f486685a15482a0d97a87</a>                                                                                         |
| Costa Rica         | Ministry of Public Health                                 | <a href="https://www.salud.gob.ec/el-ministerio-de-salud-publica-del-ecuador-msp-informa-situacion-coronavirus/">https://www.salud.gob.ec/el-ministerio-de-salud-publica-del-ecuador-msp-informa-situacion-coronavirus/</a>                                                                     |
| Dominican Republic | General Epidemiology Department                           | <a href="https://www.msp.gob.do/web/?page_id=6948">https://www.msp.gob.do/web/?page_id=6948</a>                                                                                                                                                                                                 |
| Ecuador            | Ministry of Public Health                                 | <a href="https://www.salud.gob.ec/actualizacion-de-casos-de-coronavirus-en-ecuador/">https://www.salud.gob.ec/actualizacion-de-casos-de-coronavirus-en-ecuador/</a>                                                                                                                             |
| El Salvador        | Official COVID-19 platform of El Salvador government      | <a href="https://covid19.gob.sv/">https://covid19.gob.sv/</a>                                                                                                                                                                                                                                   |
| French Guyana      | University Johns Hopkins                                  | <a href="https://github.com/CSSEGISandData/COVID-19/blob/master/csse_covid_19_data/csse_covid_19_time_series/time_series_covid19_confirmed_US.csv">https://github.com/CSSEGISandData/COVID-19/blob/master/csse_covid_19_data/csse_covid_19_time_series/time_series_covid19_confirmed_US.csv</a> |
| Haiti              | Ministry of Public Health and Population                  | <a href="https://www.mspp.gouv.ht/">https://www.mspp.gouv.ht/</a>                                                                                                                                                                                                                               |
| Honduras           | Office for Presidential communication and strategy        | <a href="https://covid19honduras.org/">https://covid19honduras.org/</a>                                                                                                                                                                                                                         |
| Mexico             | National Direction of Epidemiology                        | <a href="https://covid19.sinave.gob.mx/">https://covid19.sinave.gob.mx/</a>                                                                                                                                                                                                                     |

| Country       | Source                                           | URL                                                                                                                                                                                                                                                                                             |
|---------------|--------------------------------------------------|-------------------------------------------------------------------------------------------------------------------------------------------------------------------------------------------------------------------------------------------------------------------------------------------------|
| Panama        | Ministry of Health                               | <a href="http://minsa.gob.pa/coronavirus-covid19">http://minsa.gob.pa/coronavirus-covid19</a>                                                                                                                                                                                                   |
| Paraguay      | Ministry of Public Health and Social Welfare     | <a href="https://www.mspbs.gov.py/reportes-covid19.html">https://www.mspbs.gov.py/reportes-covid19.html</a>                                                                                                                                                                                     |
| Peru          | Ministry of Public Health                        | <a href="https://covid19.minsa.gob.pe/sala_situacional.asp">https://covid19.minsa.gob.pe/sala_situacional.asp</a>                                                                                                                                                                               |
| Puerto Rico   | Health Department of Puerto Rico                 | <a href="https://medicinaysaludpublica.com/covid-19/">https://medicinaysaludpublica.com/covid-19/</a>                                                                                                                                                                                           |
| Uruguay       | National Urgencies System                        | <a href="https://www.gub.uy/sistema-nacional-emergencias/pagina-embebida/visualizador-casos-coronavirus-covid-19-uruguay">https://www.gub.uy/sistema-nacional-emergencias/pagina-embebida/visualizador-casos-coronavirus-covid-19-uruguay</a>                                                   |
| United States | University Johns Hopkins                         | <a href="https://github.com/CSSEGISandData/COVID-19/blob/master/csse_covid_19_data/csse_covid_19_time_series/time_series_covid19_confirmed_US.csv">https://github.com/CSSEGISandData/COVID-19/blob/master/csse_covid_19_data/csse_covid_19_time_series/time_series_covid19_confirmed_US.csv</a> |
| Venezuela     | Official Venezuelan government COVID-19 platform | <a href="https://covid19.patria.org.ve/estadisticas-venezuela/">https://covid19.patria.org.ve/estadisticas-venezuela/</a>                                                                                                                                                                       |

S2)

The incidence of COVID-19 is correlated with population density in the American continent

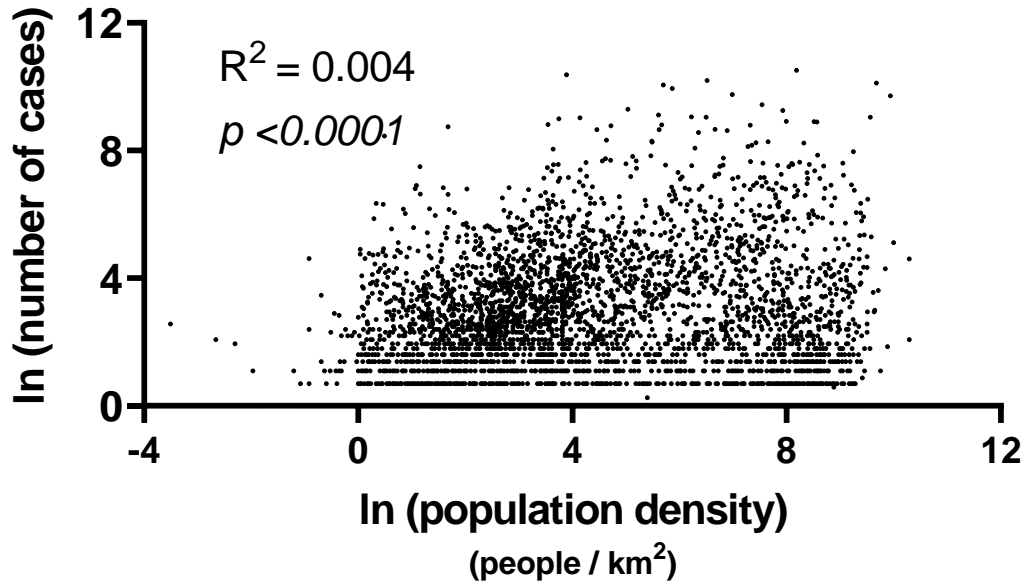

# S3) Effect of altitude in the incidence of COVID-19 per countries

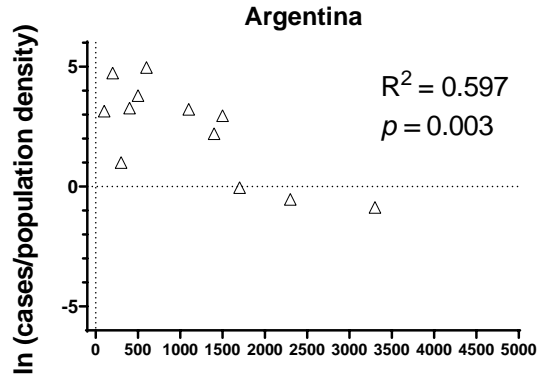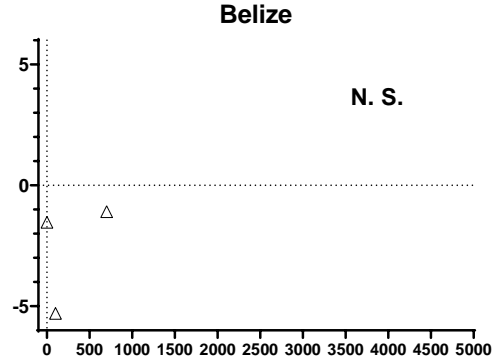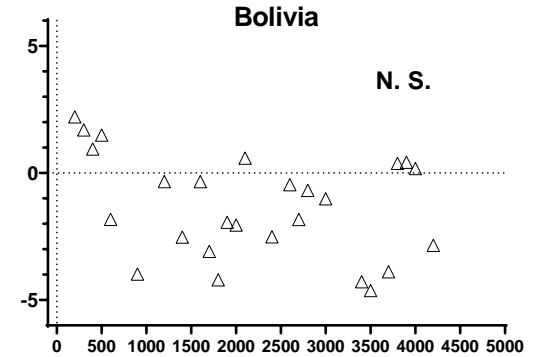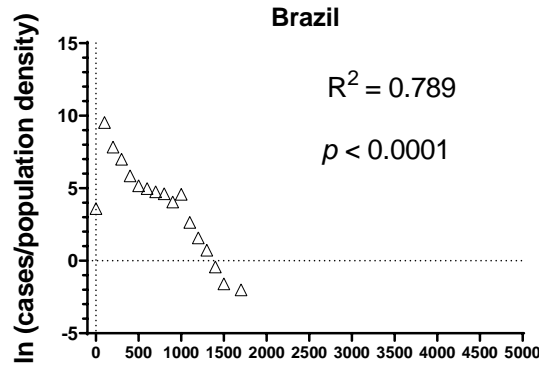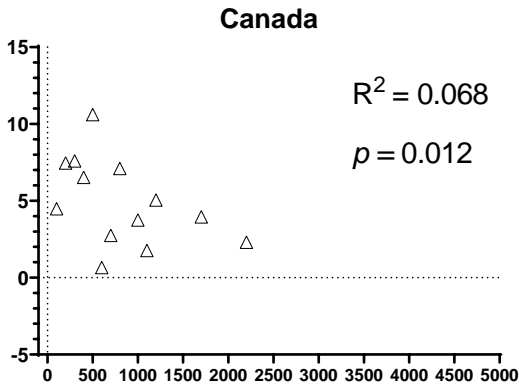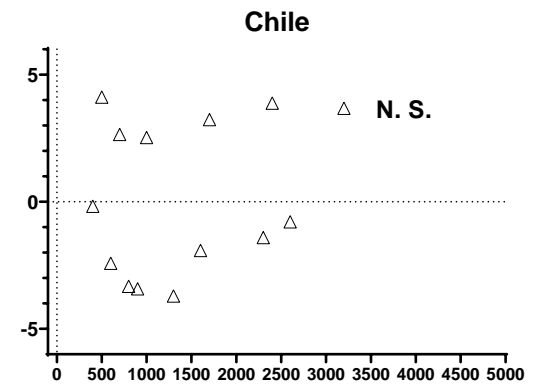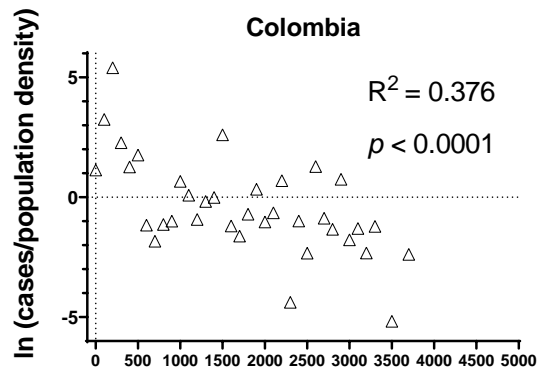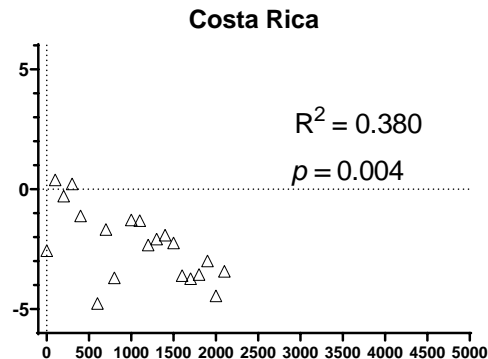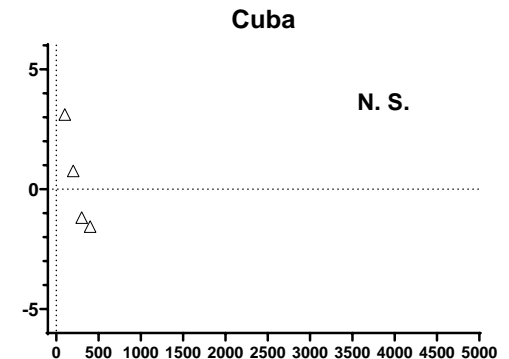

Altitude (masl)

Altitude (masl)

Altitude (masl)

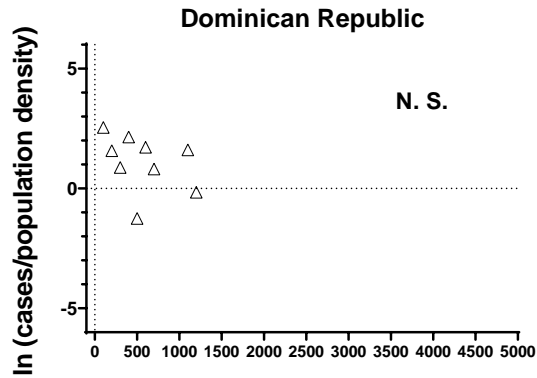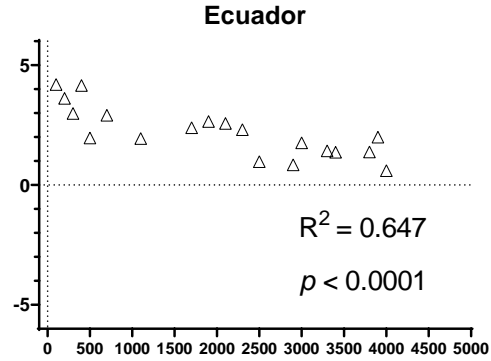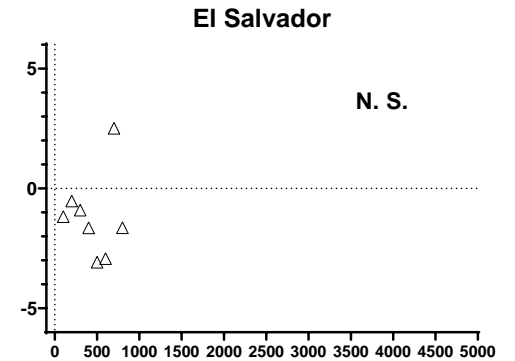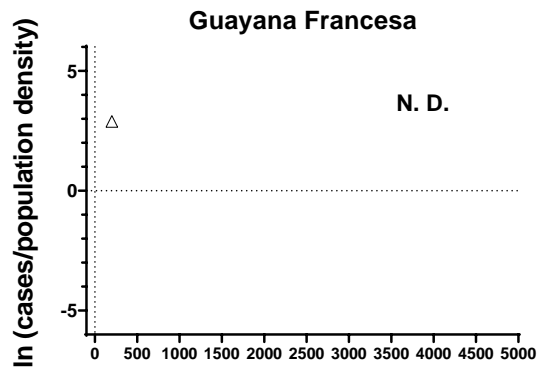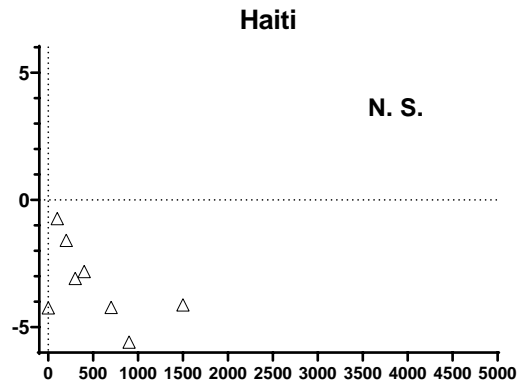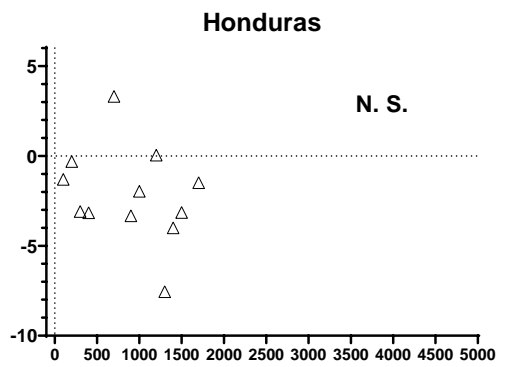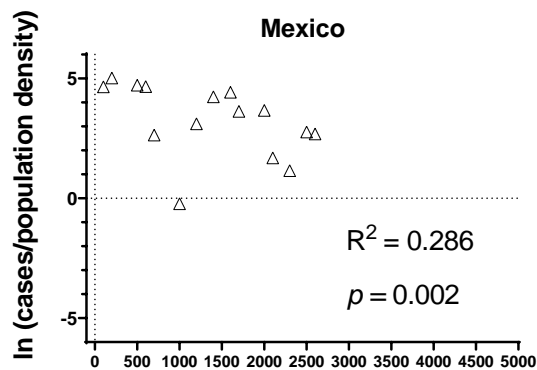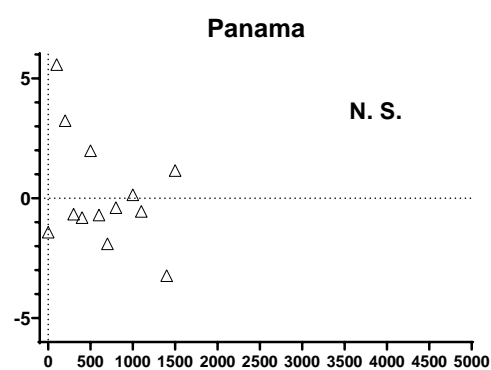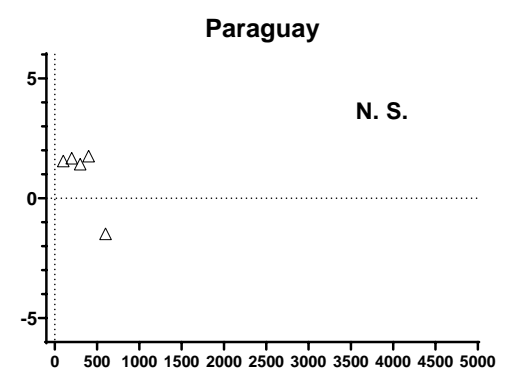

Altitude (masl)

Altitude (masl)

Altitude (masl)

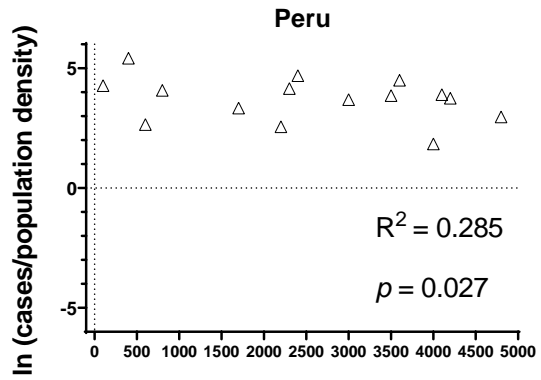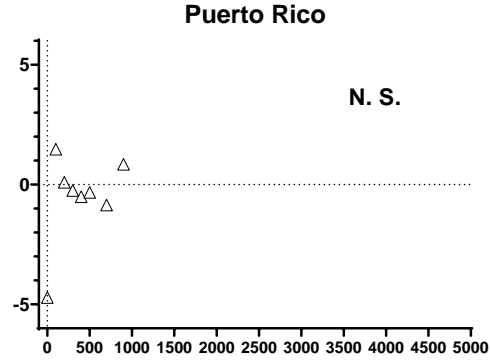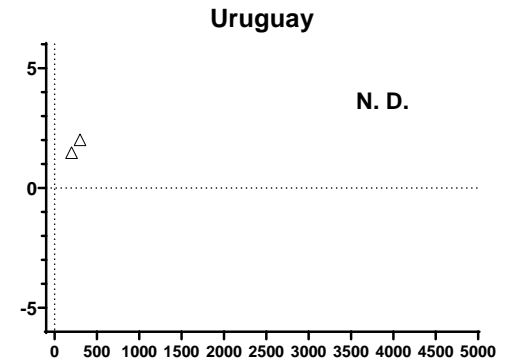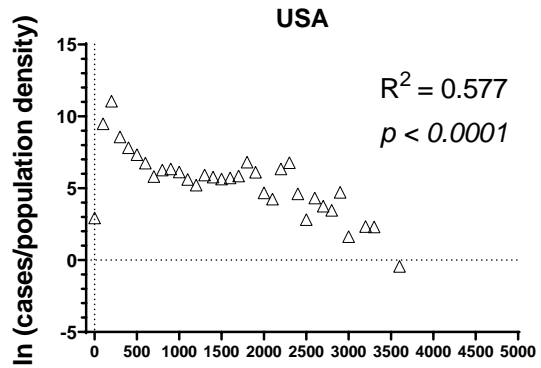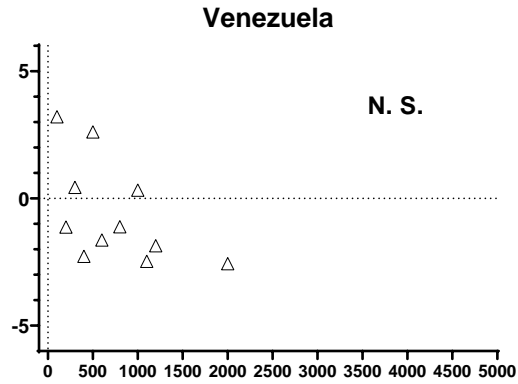

**Altitude (masl)**

**Altitude (masl)**

**Altitude (masl)**
